# Supplementary material for: Succinic anhydride as a deposition-regulating additive for dendrite-free lithium metal anodes
Source: Royal Society of Chemistry journal article supplement (doi:10.1039/d1ta04043j), 2021-01-01
Supplement: d1ta04043j1.pdf [file d1ta04043j1.pdf]

# Supporting Information

## Succinic Anhydride as a Deposition-Regulating Additive for Dendrite-Free Lithium Metal Anodes

Yu-Xiang Xie,<sup>a</sup> Yi-Xin Huang,<sup>a</sup> Xiao-Hong Wu,<sup>a</sup> Chen-Gung Shi,<sup>a</sup> Li-Na Wu,<sup>a</sup> Cun Song,<sup>a</sup> Jing-Jing Fan,<sup>a</sup> Peng Dai,<sup>a</sup> Ling Huang<sup>\*a</sup>, Ying-Jie Hua,<sup>b</sup> Chong-Tai Wang<sup>\*b</sup>, Yi-Min Wei,<sup>c</sup> Shi-Gang Sun<sup>\*a</sup>

a. State Key Laboratory of Physical Chemistry of Solid Surfaces, Collaborative Innovation Center of Chemistry for Energy Materials, College of Chemistry and Chemical Engineering, Xiamen University, Xiamen, 361005, China

E-mail: [huangl@xmu.edu.cn](mailto:huangl@xmu.edu.cn) (L. Huang), [sgsun@xmu.edu.cn](mailto:sgsun@xmu.edu.cn) (S. Sun)

b. College of Chemistry and Chemical Engineering, Hainan Normal University, Key Laboratory of Electrochemical Energy Storage and Energy Conversion of Hainan Province, Haikou 571158, China

E-mail: [oehy2014@163.com](mailto:oehy2014@163.com) (C. Wang)

c. 21C Innovation Laboratory, Contemporary Amperex Technology Co., Ningde, 352100, China

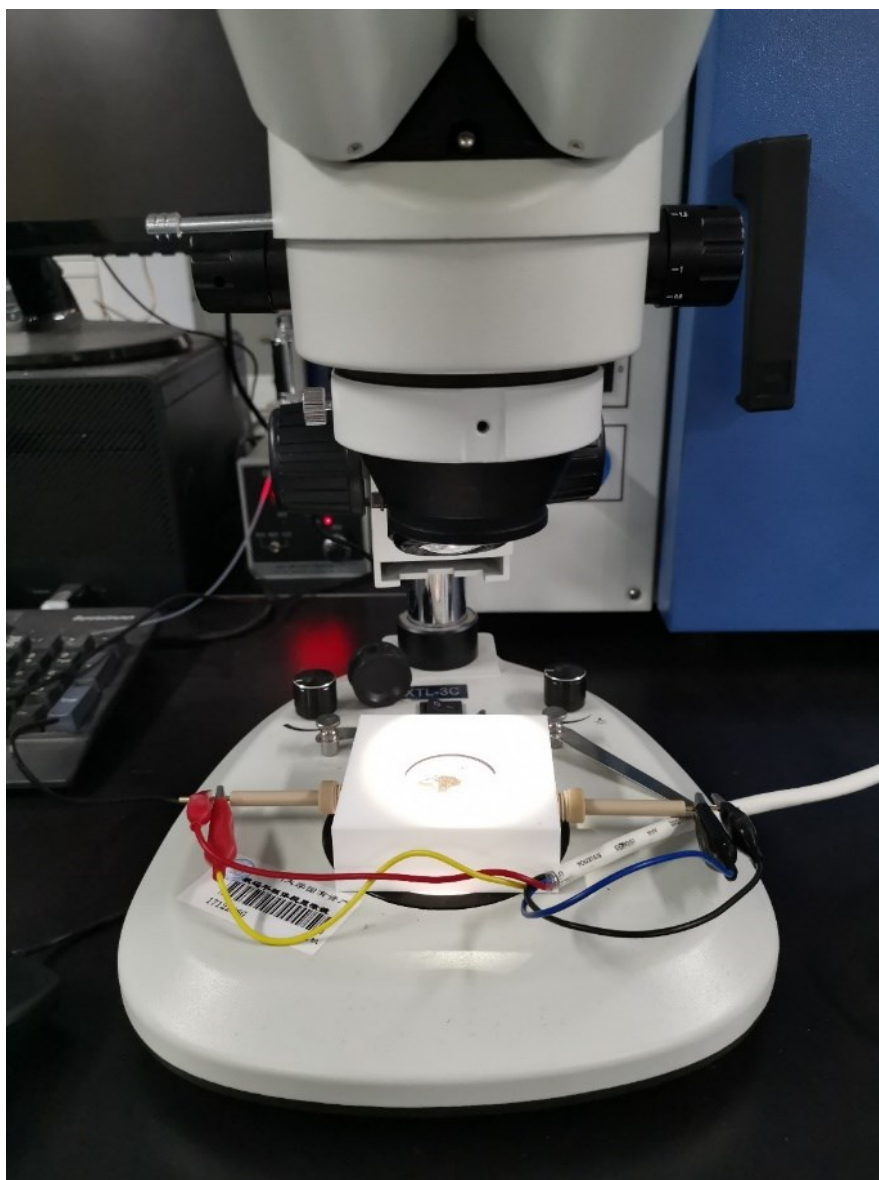

**Figure S1.** Optical electrochemical cell for in situ optical characterization.

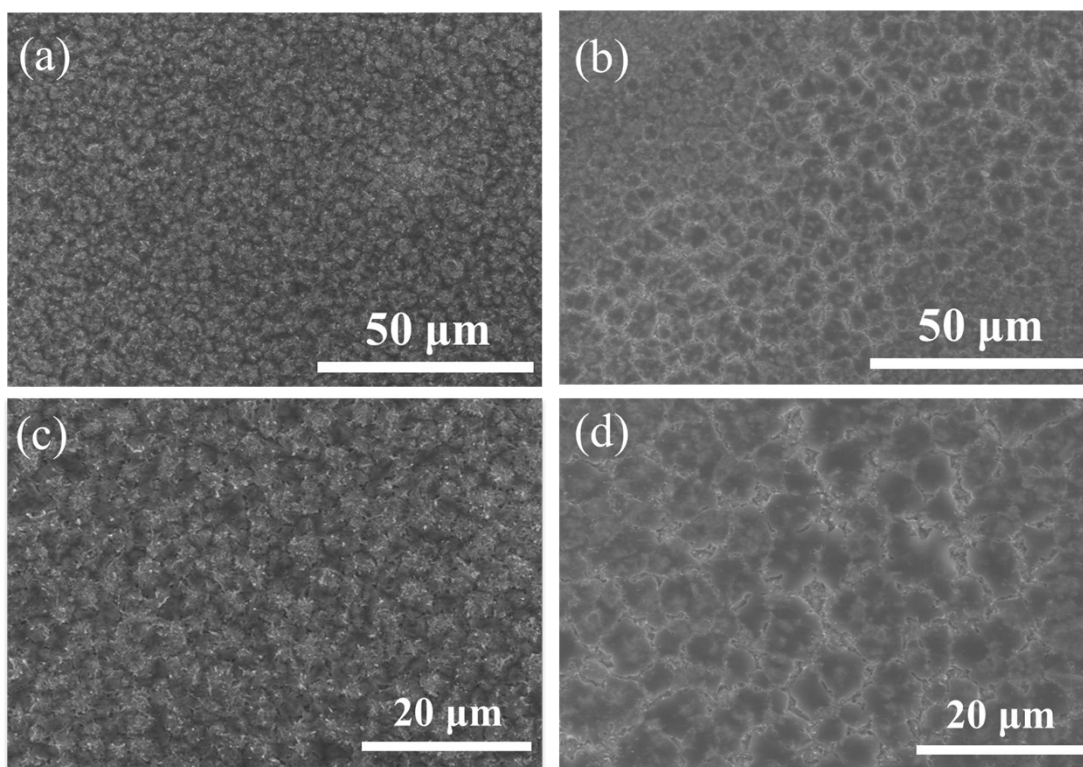

**Figure S2.** SEM images of Li deposition on a Cu foil without (e) and with 3.0 wt% SA (f) after Li plating for 300 s at a current density of  $0.5 \text{ mA cm}^{-2}$ .

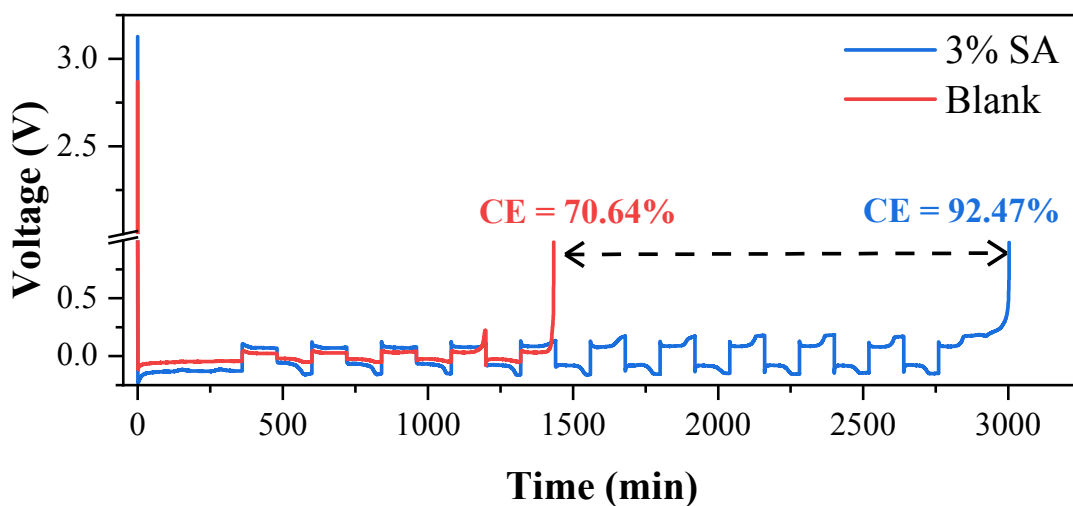

**Figure S3.** Li plating/stripping CE in Li||Cu cells in electrolytes with and without SA at a current density of  $0.5 \text{ mA cm}^{-2}$  and a capacity of  $1 \text{ mAh cm}^{-2}$ .

To simulate the Li plating/stripping cycles of a Li anode and minimize the impact of the Cu substrate, a more accurate coulombic efficiency measurement method was applied here, which is similar to the earlier work.<sup>1</sup> First, a capacity of  $3 \text{ mAh/cm}^2$  of Li was deposited on Cu substrate as reversible Li (Qr) at a current of  $0.5 \text{ mA/cm}^2$ . Then,

one-third of plating Li (1 mAh/cm<sup>2</sup>, Q<sub>c</sub>) was stripped/plated at same current density each time. Finally, the remaining Li (Q<sub>s</sub>) after 10 Li plating/stripping cycles was completely stripped to 1.0 V to calculate the Coulombic efficiency. CE (Coulombic efficiency) can be calculated by the following equation:

$$CE = \frac{10Q_c + Q_s}{10Q_c + Q_r}$$

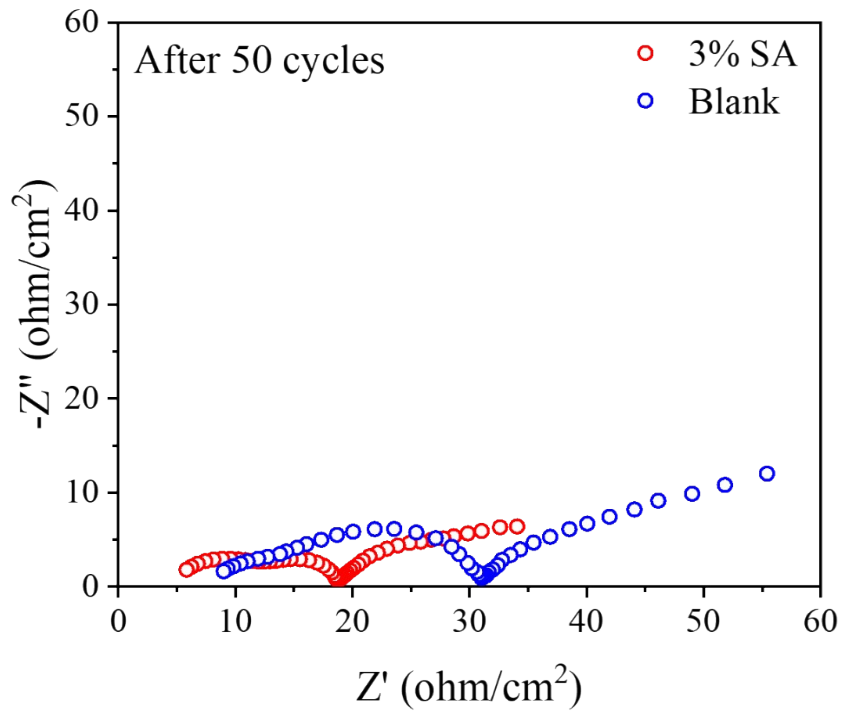

**Figure S4.** EIS spectra of Li|Li cells after 50 cycles with and without SA as an additive.

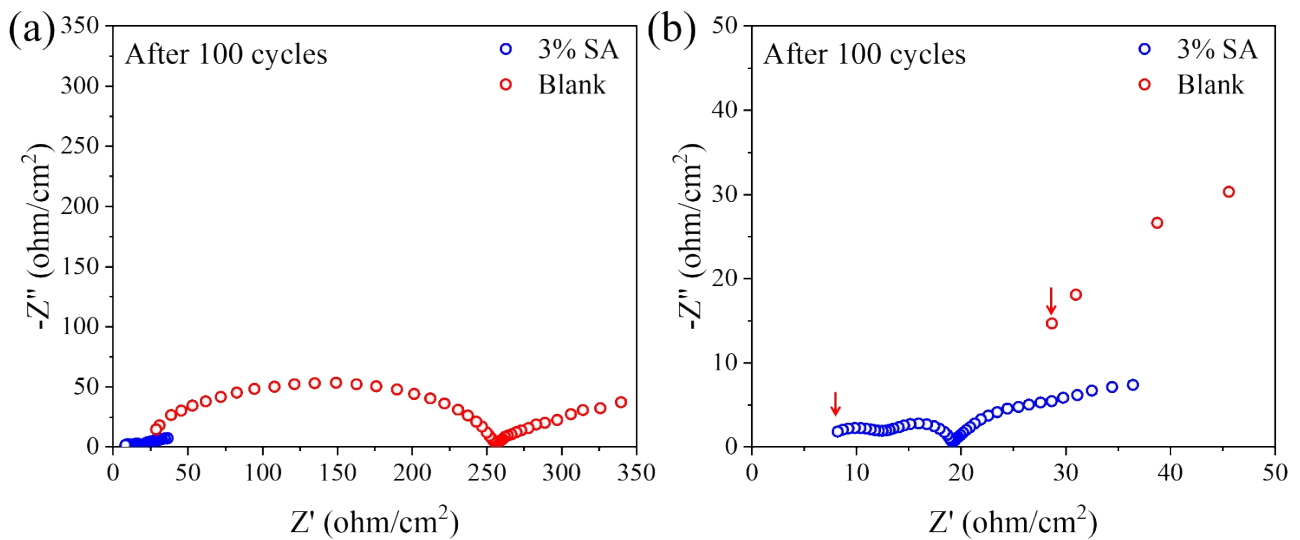

**Figure S5.** EIS spectra of Li|Li cells after 100 cycles with and without SA as an additive(a), and (b) an enlarged view of the high-frequency region marked by the red rectangle in (a).

**Table S1.** The comparisons of cycle stability between our work and previous reports

| Electrolyte additives                | Current Density (mA cm <sup>-2</sup> ) | Areal capacity (mAh cm <sup>-2</sup> ) | Cycle number | Year s           | Ref.             |
|--------------------------------------|----------------------------------------|----------------------------------------|--------------|------------------|------------------|
| 3wt%                                 |                                        |                                        |              |                  |                  |
| hexafluoroacetylacetone (HFAA)       | 1.0                                    | 0.5                                    | 200          | 2019             | 2                |
| 3 wt% 15-Crown-5                     | 1.0                                    | 0.5                                    | 170          | 2020             | 3                |
| 0.15 M 1,3,5-benzenetrith            | 0.5                                    | 0.5                                    | 200          | 2021             | 4                |
| 1.0 M (Pyr1(12) FSI                  | 0.5                                    | 2                                      | ~110         | 2018             | 5                |
| 0.05 M LiPF <sub>6</sub> + dual-salt | 1.0                                    | 0.5                                    | 210          | 2017             | 6                |
| 8 wt% AlCl <sub>3</sub>              | 0.5                                    | 1.0                                    | ~235         | 2017             | 7                |
| 5% LiNO <sub>3</sub>                 | 0.5                                    | 0.5                                    | 150          | 2019             | 8                |
| 20 mM Boric acid                     | 0.25                                   | 0.5                                    | 215          | 2018             | 9                |
| 2 wt% VC + 2 wt% LiDFP               | 0.5                                    | 1.0                                    | 200          | 2020             | 10               |
| 3 wt% SA                             | 1.0                                    | 0.5                                    | 300          | <b>This work</b> | <b>This work</b> |

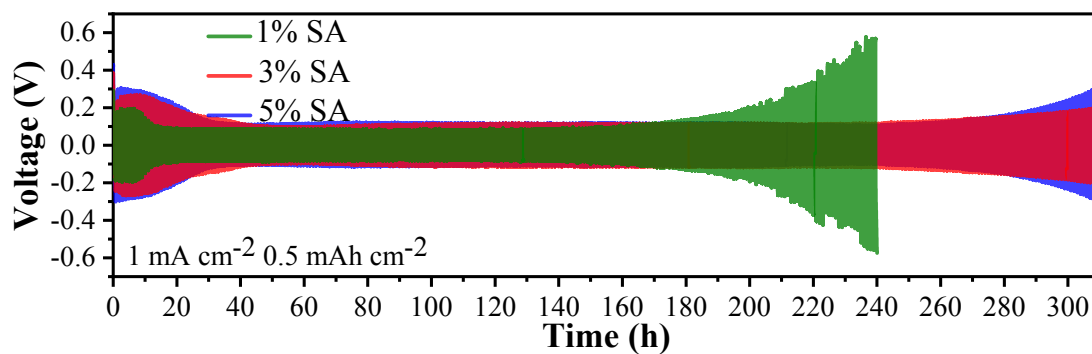

**Figure S6.** Voltage–time profiles of symmetric cells cycling in 1.0, 3.0, and 5.0 wt% SA-containing electrolytes.

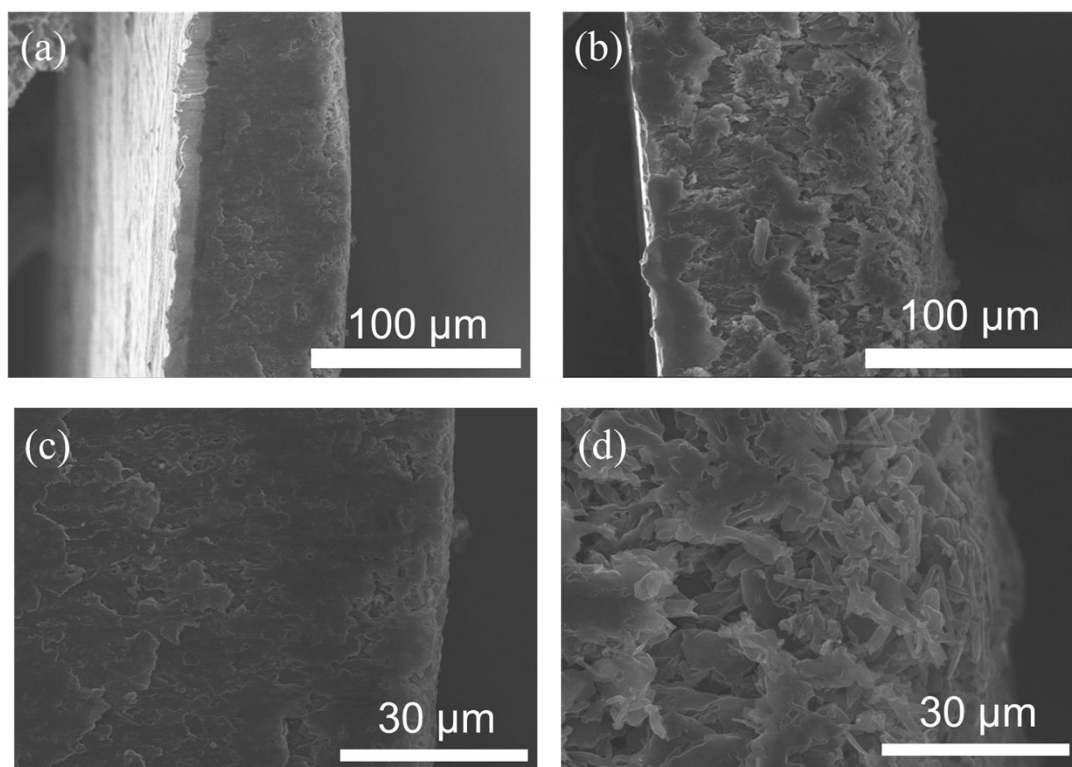

**Figure S7.** Side-view SEM images of Li deposited ( $0.5 \text{ mA cm}^{-2}$  with a fixed capacity of  $8 \text{ mAh cm}^{-2}$ ) on Cu foil in electrolytes with (a, c) and without (b, d) SA.

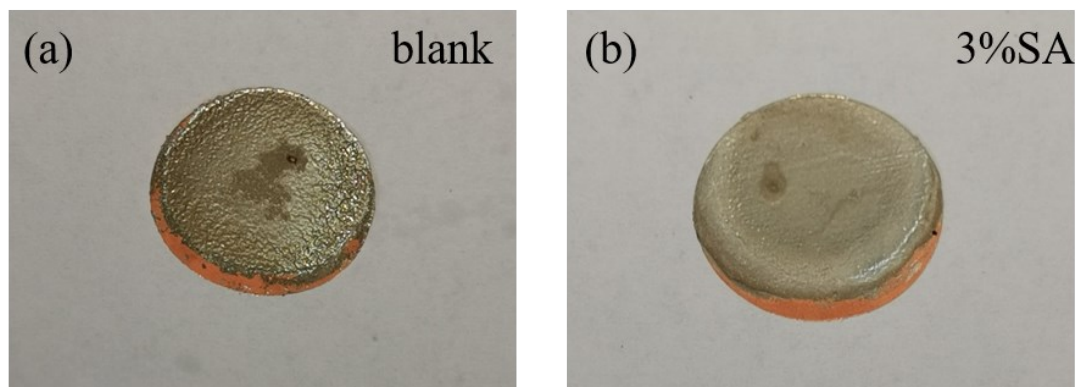

**Figure S8.** Photographs of Cu substrates after plating at  $8 \text{ mAh g}^{-1}$  in electrolytes (a) without and (b) with SA.

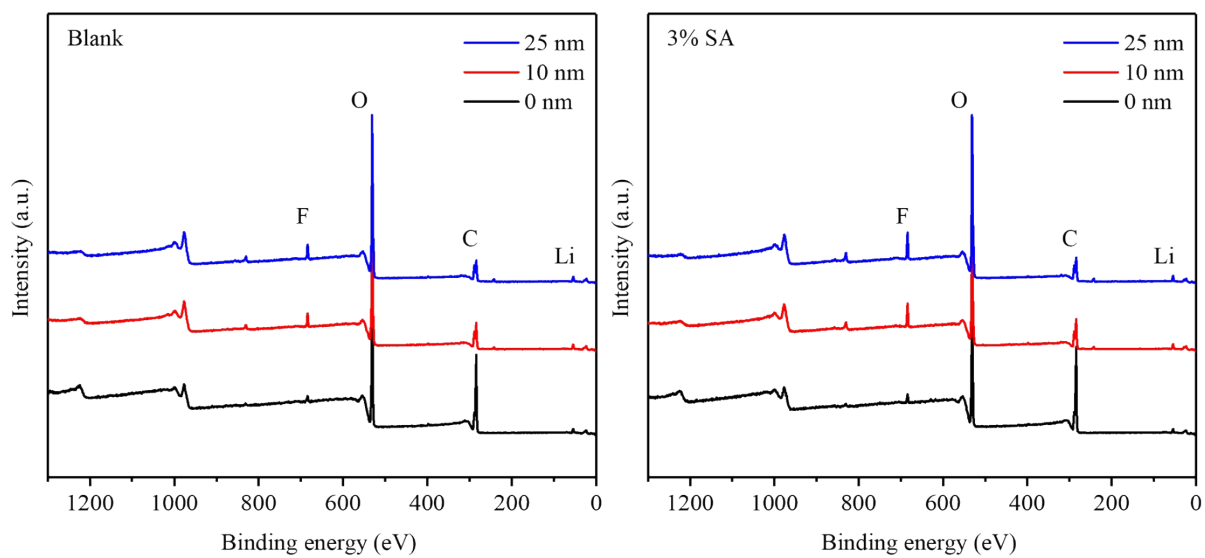

**Figure S9.** XPS profile of Li|Li cells after 50 cycles with and without SA as an additive.



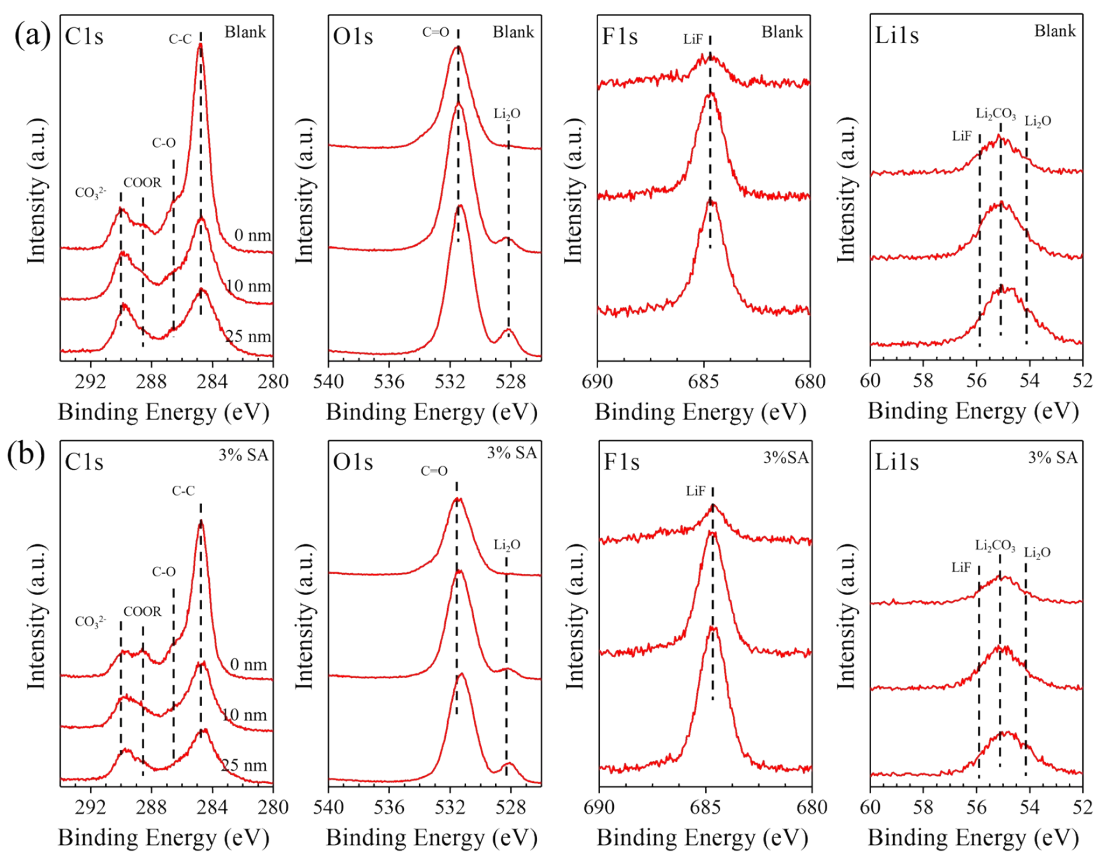

**Figure S10.** C1s, O1s, F1s, and Li1s XPS profiles of Li|Li cells after 50 cycles with and without SA as an additive.

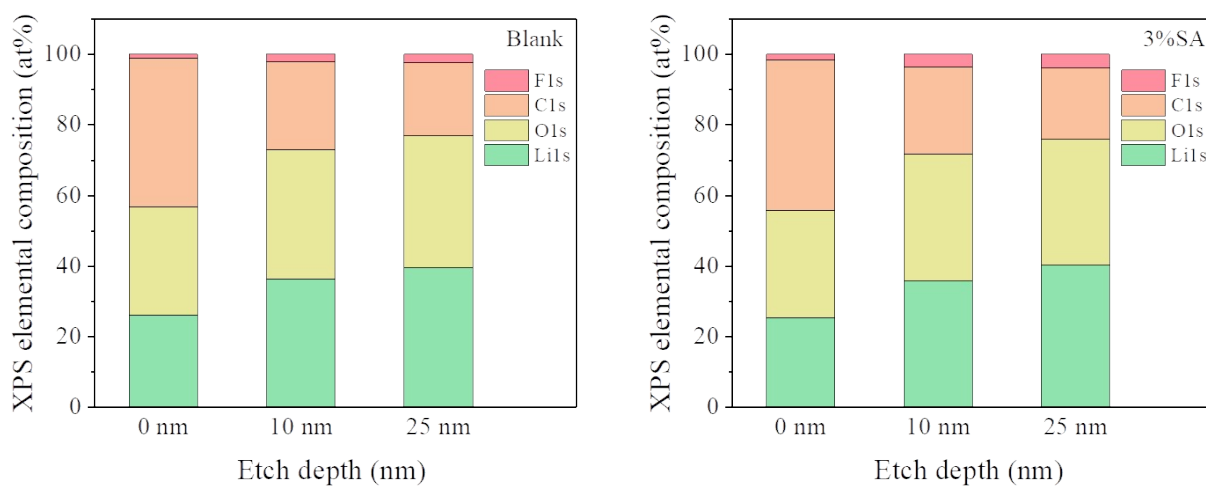

**Figure S11.** XPS elemental composition of Li|Li cells after 50 cycles in electrolytes with and without SA.



**Table S2.** XPS elemental compositions of Li|Li cells after 50 cycles without SA as an additive.

| XPS elemental composition (at%) |         |                |         |         |
|---------------------------------|---------|----------------|---------|---------|
| Etch depth (nm)                 | Li1s    | F1s            | C1s     | O1s     |
| 0                               | 25.9815 | <b>1.0609</b>  | 42.181  | 30.7766 |
| 10                              | 36.2092 | <b>2.28529</b> | 24.8257 | 36.6798 |
| 25                              | 39.4103 | <b>2.43315</b> | 20.7525 | 37.4041 |

**Table S3.** XPS elemental compositions of Li|Li cells after 50 cycles with SA as an additive.

| XPS elemental composition (at%) |         |                |         |         |
|---------------------------------|---------|----------------|---------|---------|
| Etch depth (nm)                 | Li1s    | F1s            | C1s     | O1s     |
| 0                               | 25.3255 | <b>1.56043</b> | 42.75   | 30.364  |
| 10                              | 35.6371 | <b>3.5914</b>  | 24.7417 | 36.0298 |
| 25                              | 40.1213 | <b>3.95489</b> | 20.2659 | 35.6579 |

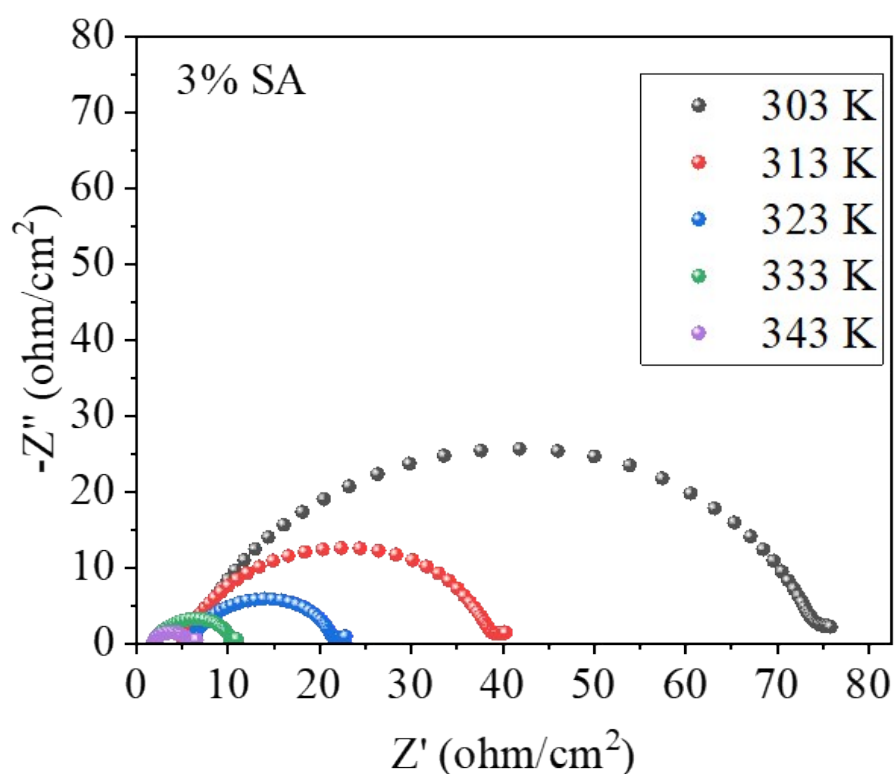

**Figure S12.** The temperature-dependence of EIS for Li anode formed in electrolyte with 3.0% SA.

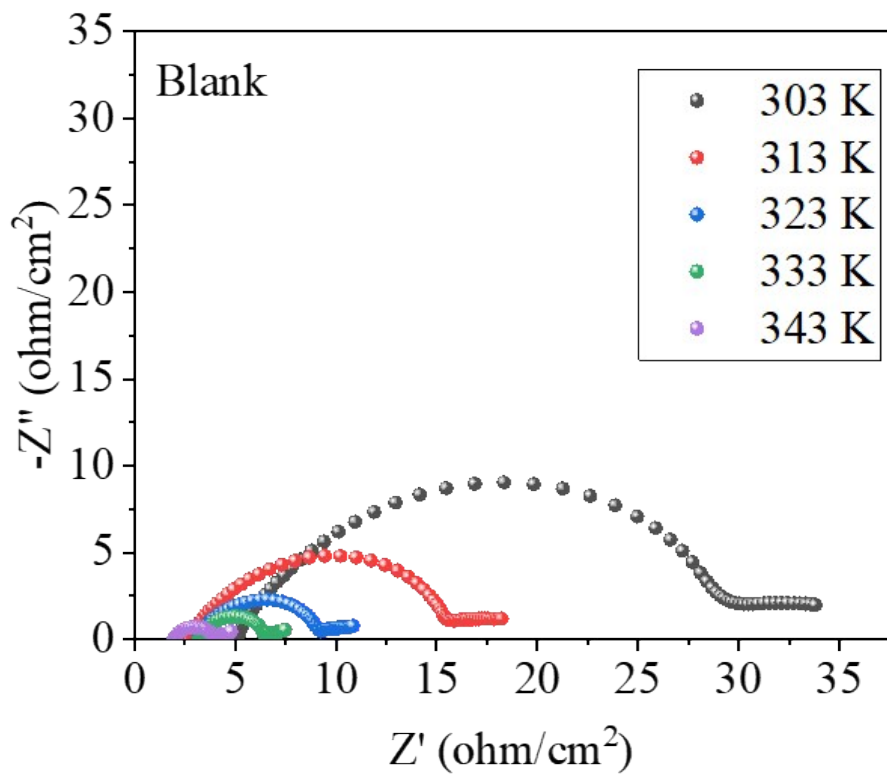

**Figure S13.** The temperature-dependence of EIS for Li anode formed in electrolyte without SA.

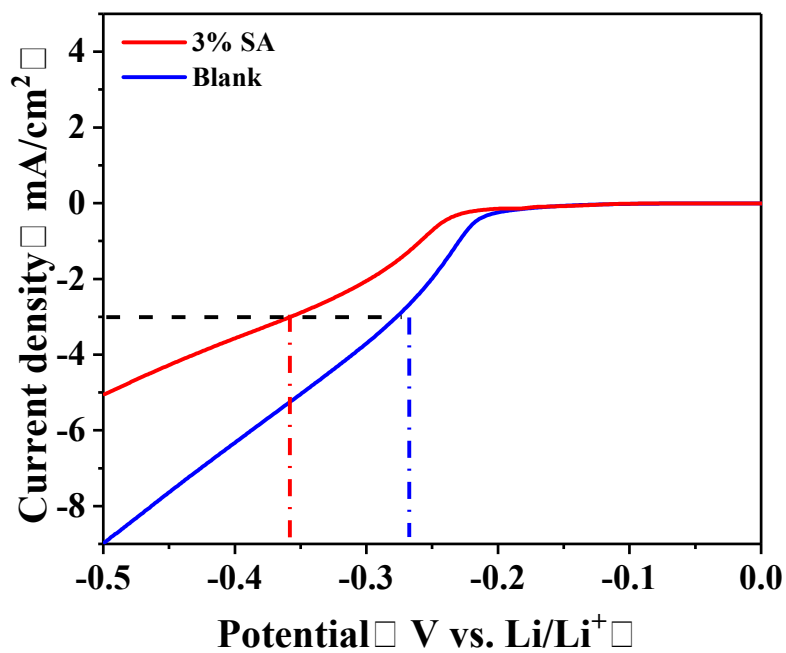

**Figure S14.** LSV curves of electrolytes with and without SA as an additive.

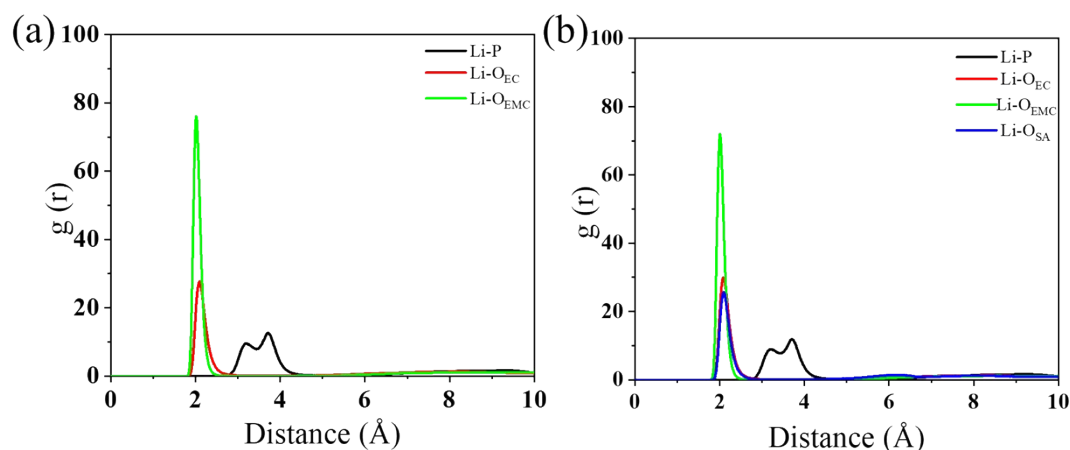

**Figure S15.** Radial distribution function ( $g(r)$ ) of  $\text{Li}^+$  in (a) blank and (b) SA-containing electrolytes.

### Supplementary References

- Adams, B. D.; Zheng, J.; Ren, X.; Xu, W.; Zhang, J.-G., Accurate Determination of Coulombic Efficiency for Lithium Metal Anodes and Lithium Metal Batteries. *Advanced Energy Materials* **2018**, *8* (7), 1702097.
- Dong, J.; Dai, H.; Fan, Q.; Lai, C.; Zhang, S., Grain refining mechanisms: Initial levelling stage during nucleation for high-stability lithium anodes. *Nano Energy* **2019**, *66*.
- Wang, H.; He, J.; Liu, J.; Qi, S.; Wu, M.; Wen, J.; Chen, Y.; Feng, Y.; Ma, J., Electrolytes Enriched by Crown Ethers for Lithium Metal Batteries. *Advanced Functional Materials* **2020**, *31* (2).
- Guo, W.; Zhang, W.; Si, Y.; Wang, D.; Fu, Y.; Manthiram, A., Artificial dual solid-electrolyte interfaces based on in situ organothiol transformation in lithium sulfur battery. *Nat Commun* **2021**, *12* (1), 3031.
- Yoo, D.-J.; Kim, K. J.; Choi, J. W., The Synergistic Effect of Cation and Anion of an Ionic Liquid Additive for Lithium Metal Anodes. *Advanced Energy Materials* **2018**, *8* (11).
- Zheng, J.; Engelhard, M. H.; Mei, D.; Jiao, S.; Polzin, B. J.; Zhang, J.-G.; Xu, W., Electrolyte additive enabled fast charging and stable cycling lithium metal batteries. *Nature Energy* **2017**, *2* (3).
- Ye, H.; Yin, Y.-X.; Zhang, S.-F.; Shi, Y.; Liu, L.; Zeng, X.-X.; Wen, R.; Guo, Y.-G.; Wan, L.-J., Synergism of Al-containing solid electrolyte interphase layer and Al-based colloidal particles for stable lithium anode. *Nano Energy* **2017**, *36*, 411-417.
- Tan, S. J.; Yue, J.; Hu, X. C.; Shen, Z. Z.; Wang, W. P.; Li, J. Y.; Zuo, T. T.; Duan, H.; Xiao, Y.; Yin, Y. X.; Wen, R.; Guo, Y. G., Nitriding-Interface-Regulated Lithium Plating Enables Flame-Retardant Electrolytes for High-Voltage

Lithium Metal Batteries. *Angew Chem Int Ed Engl* **2019**, *58* (23), 7802-7807.

9. Huang, Z.; Ren, J.; Zhang, W.; Xie, M.; Li, Y.; Sun, D.; Shen, Y.; Huang, Y., Protecting the Li-Metal Anode in a Li-O<sub>2</sub> Battery by using Boric Acid as an SEI-Forming Additive. *Adv Mater* **2018**, *30* (39), e1803270.

10. Zheng, G.; Xiang, Y.; Chen, S.; Ganapathy, S.; Verhallen, T. W.; Liu, M.; Zhong, G.; Zhu, J.; Han, X.; Wang, W.; Zhao, W.; Wagemaker, M.; Yang, Y., Additives synergy for stable interface formation on rechargeable lithium metal anodes. *Energy Storage Materials* **2020**, *29*, 377-385.

## **Author Contributions**

Y.-X. Xie, L. Huang, C.-T. Wang and S.-G. Sun conceived the concept and supervised the project. Y.-X. Xie, Y.-X. Huang, X.-H. Wu, C. Song, J.-J. Fan, P. Dai and Yi-Min Wei performed materials synthesis and characterization and data analysis. Y.-X. Xie, Y.-X. Huang, and X.-H. Wu, performed theoretical calculations. Y.-X. Xie, Y.-X. Huang, X.-H. Wu, C.-G. Shi, L.-N. Wu, and C. Song carried out battery preparation and electrochemical measurements. Y.-X. Xie, L. Huang, C.-T. Wang, Y.-J. Hua and S.-G. Sun wrote the manuscript. Y.-X. Xie, L. Huang, C.-T. Wang, Yi-Min Wei, Y.-J. Hua and S.-G. Sun revised the manuscript. All authors were contributing to the discussion of the study.
